# Supplementary material
Source: Springer Nature journal article supplement (https://www.springermedizin.de/resource/supplementary/13075_2011_3470_MOESM8_ESM.pdf/9694616)

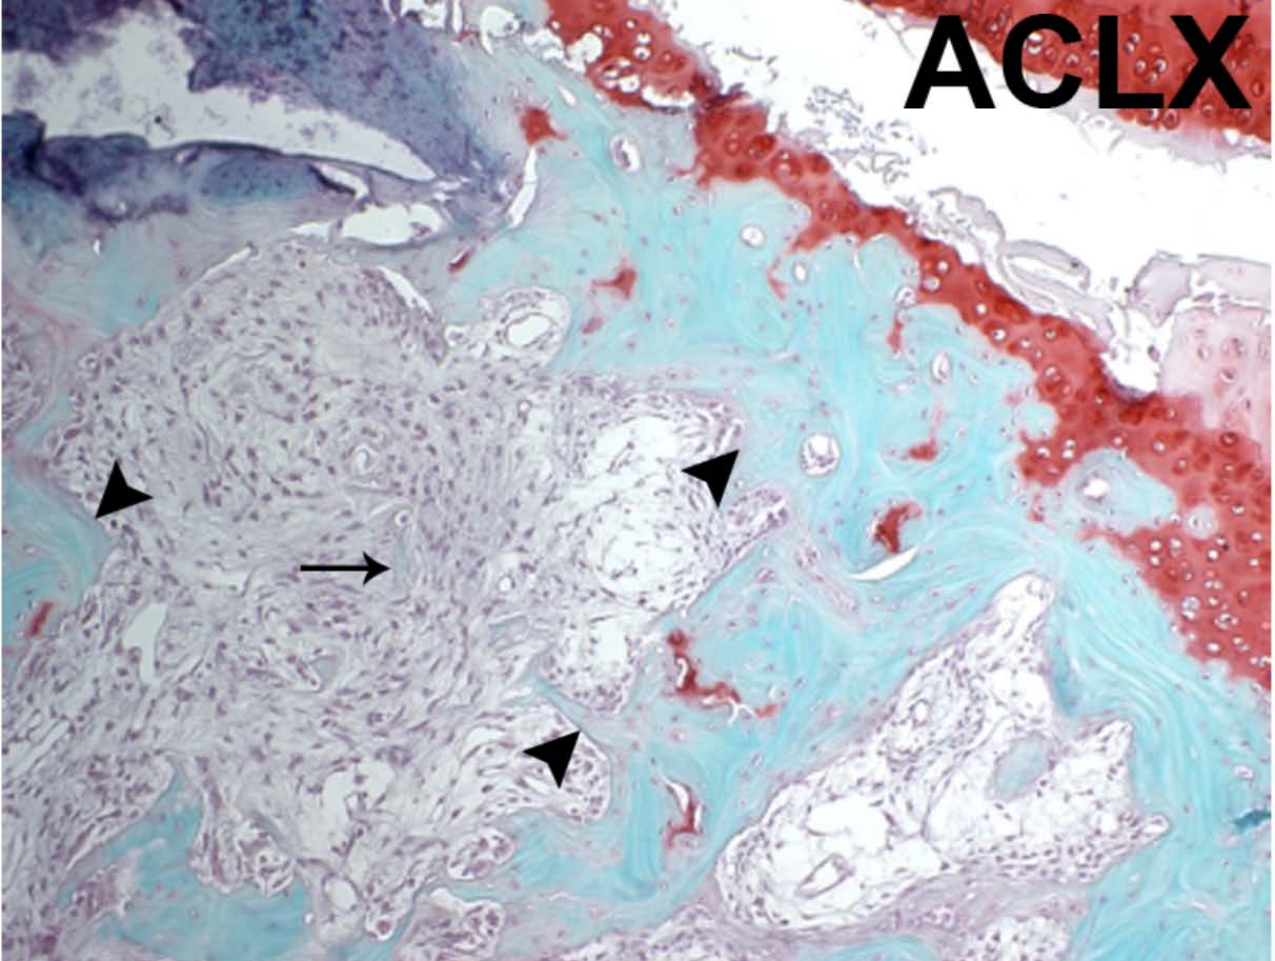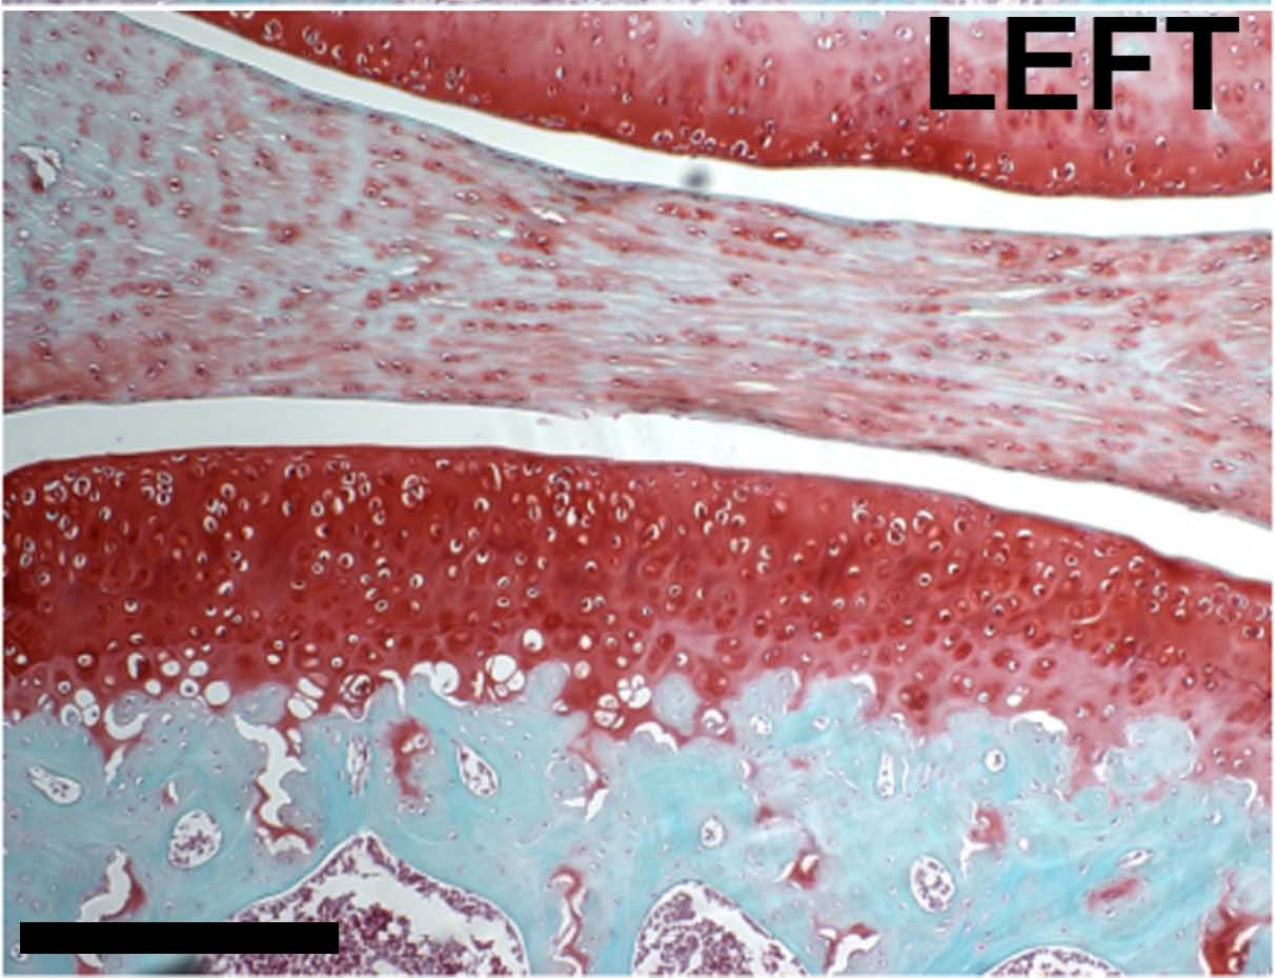

Supplement: MOESM8 [file 9694616]
